# Supplementary material for: Prevalence of Chlamydia trachomatis and Neisseria gonorrhoeae in the homeless population of Medellín, Colombia: a cross-sectional study
Source: HighWire-hosted journal article supplement (doi:10.1136/bmjopen-2021-054966), 2022-03-01
Supplement: bmjopen-2021-054966supp001_data_supplement.pdf [file bmjopen-2021-054966supp001_data_supplement.pdf]

Velez-Gómez *et al.***Supplementary material****1. Translated questionnaire**

1. Interview place
2. Bar code
3. Name of the interviewer
4. Interviewer code
5. Participant name
6. Identification
7. Biological sex
8. Department where they were born
9. Municipality where they were born
10. Time of residence in Medellín (Years)
11. How long ago did you leave your home?
12. How long have you been living on the street?
13. For what reasons did you become homeless?
14. Do you have contact with your family?
15. With whom did you become homeless?
16. Where do you currently live?
17. What neighborhood or area do you currently live in?
18. How old are you?
19. According to your culture, people or physical characteristics, what is your race.
20. What is your sexual orientation?
21. What is your marital status?
22. What is the highest level of study that you have graduated from?
23. Are you currently studying?
24. If so, what program are you currently attending?
25. Have you ever dropped out of school or college?
26. If you dropped out, what was the main reason for having done so?
27. In the last month, list all the places where you slept.
28. Where did you sleep last night?
29. In the last 3 months, indicate all the ways in which you earned or received money
30. What is your daily income?
31. What do you do with the money you get?
32. Have you been in jail?
33. Are you registered in the public health system?
34. How often do you shower?
35. In what places do you shower?
36. When was the last time you went to the doctor or a health center?
37. For what reasons have you visited the doctor or health center in the last 6 months?
38. How is your relationship with your family
39. What kind of support do you receive from your family?
40. Do you currently belong to a group or program for homeless people?

Velez-Gómez *et al.*

41. Which group do you belong to?
42. How often do you use substances?
43. During the past 6 months, have you had a sexually transmitted infection?
44. Which sexually transmitted infection (s) have you had?
45. Which sexually transmitted infection (s) have you had? [Other]
46. Did you receive medical treatment? (Ignore if the answer to the last two questions was negative)
47. If you had an STI, where did you go?
48. What did you or your partner (s) do to avoid infecting the other?
49. How often have you had the opportunity to participate in educational activities related to sexuality?
50. In the last 6 months, have you had sores or ulcers on your genitals?
51. When was the last time you had a Pap smear?
52. What was the result of the last Pap smear?
53. In the last 6 months, have you had burning with abnormal vaginal discharge?
54. In the last 6 months, have you had urethral discharge?
55. What planning and protection methods are you familiar with?
56. Do you use any contraceptive method?
57. What methods do you currently use?
58. How old were you when you had your first sexual encounter?
59. Who was the person with whom you had your first sexual encounter with?
60. Have you had sexual relations without consent?
61. Do you have biological children?
62. If yes, how many have you had?
63. How often do you have sex?
64. How many sexual partners have you had in your entire life?
65. How many sexual partners have you had in the last 6 months?
66. In your life, with how many men have you had sex?
67. In your life, with how many women have you had sex?
68. In your life, with how many transsexuals have you had sex?
69. Have you had sex without a condom in the last 3 months?
70. Have you ever requested a voluntary interruption of pregnancy in any health institution?  
[Women only]
71. Do you know of a place where you can get condoms?
72. Generally, how do you get condoms?
73. When you have sex, who generally suggests using a condom?
74. How easy would it be for you to get a condom if you need one?
75. Has a person or institution ever told you the correct way to use a condom?
76. How long would you be in a relationship to decide not to use a condom with this person?
77. Have you or did you have a stable sexual partner in the last 6 months?
78. Are you in a monogamous relationship?
79. How often did you and / or your monogamous partner use a condom when you had sex in the last 6 months?

Velez-Gómez *et al.*

80. What or what were the reasons why you did not use a condom with your monogamous partner?
81. Have you had casual or casual sexual partners in the last 6 months?
82. Your casual partners are generally:
83. How often did you and / or your casual partners use a condom when you had sexual intercourse in the last 6 months
84. What or what were the reasons for not using a condom with your casual partner ?
85. Status of the couple
86. Sector / neighborhood where the couple lives
87. Place where they met
88. What is the location of this place?
89. Did you or your partner used contraceptives before or during the relationship?

## 2. Original questionnaire (Spanish version)

1. Lugar de la entrevista
2. Código de barras
3. Nombre del participante
4. Identificación
5. Sexo biológico
6. Entrevistador
7. Persona
8. Departamento donde nació
9. Municipio donde nació
10. Tiempo de residencia en Medellín (Años)
11. ¿Hace cuanto tiempo abandonó su hogar?
12. ¿Cuánto tiempo lleva viviendo en la calle?
13. ¿Por qué razones llegó a la calle? [Desplazamiento forzado por actores armados]
14. ¿Tiene contacto con la familia?
15. ¿Con quién llegó a la calle?
16. ¿Dónde vive actualmente?
17. ¿En qué barrio o zona vive actualmente?
18. ¿Qué edad tiene usted?
19. De acuerdo con su cultura, pueblo o rasgos físicos, usted es o se reconoce como:
20. ¿Cuál es su orientación sexual?
21. ¿Cuál es su estado civil?
22. ¿Cuál es el nivel de estudio más alto que usted tiene aprobado?
23. ¿Usted estudia actualmente?
24. Actualmente está asistiendo a:
25. ¿Alguna vez abandonó la escuela o el colegio?
26. ¿En caso de haber abandonado los estudios, ¿cuál fue la principal razón haberlo hecho?
27. En el último mes, indique todos los lugares donde ha dormido

Velez-Gómez *et al.*

28. ¿Dónde durmió anoche?
29. En los últimos 3 meses, indique todas las maneras a través de las cuales ganó o recibió dinero
30. ¿Cuánto dinero consigue en un día por la actividad que desempeña?
31. ¿Qué hace con el dinero que obtiene?
32. ¿Usted ha estado en la cárcel?
33. ¿Cuál es el tipo de vinculación que usted tiene al sistema de salud?
34. ¿Con qué frecuencia se asea o baña usted?
35. ¿En qué lugares se asea o se baña usted?
36. ¿Cuándo fue la última vez que fue al médico o centro de salud?
37. ¿Por qué razones ha acudido los últimos 6 meses al médico o centro de salud?
38. Relación con su familia
39. ¿Qué tipo de apoyo recibe usted de su familia?
40. ¿Actualmente pertenece a algún grupo o programa de personas en situación de calle?
41. ¿A cuál grupo pertenece?
42. ¿Con qué frecuencia consume las siguientes sustancias?
43. Durante los últimos 6 meses, ¿ha tenido alguna infección de transmisión sexual?
44. ¿Cuál o cuáles infecciones de transmisión sexual tiene o ha tenido?
45. ¿Cuál o cuáles infecciones de transmisión sexual tiene o ha tenido?
46. Para esa o esas infecciones que tuvo, ¿usted recibió tratamiento médico?
47. En caso de haber tenido una ITS, ¿a dónde acudió?
48. ¿Qué hizo usted o su(s) pareja(s) para evitar infectar al otro?
49. ¿Con qué frecuencia usted ha tenido la oportunidad de participar en actividades de educación relacionadas con la sexualidad?
50. ¿En los últimos 6 meses usted ha tenido llagas o úlceras en los genitales?
51. ¿Cuándo fue la última vez que le hicieron la citología vaginal?
52. ¿Cuál fue el resultado de la última citología vaginal?
53. ¿En los últimos 6 meses usted ha tenido ardor con flujo vaginal anormal?
54. ¿En los últimos 6 meses usted ha tenido secreción uretral?
55. ¿Qué métodos de planificación y protección conoce?
56. ¿Utiliza algún método?
57. ¿Qué métodos utiliza actualmente?
58. ¿Cuántos años tenía usted cuando tuvo su primera relación sexual?
59. La persona con la que tuvo su primera relación sexual era:
60. ¿Usted ha tenido relaciones sexuales sin su consentimiento?
61. ¿Ha tenido algún hijo o hija?
62. De ser afirmativo, ¿cuántos ha tenido?
63. ¿Con qué frecuencia tiene relaciones sexuales?
64. ¿Cuántas parejas sexuales ha tenido durante toda su vida?
65. ¿Cuántas parejas sexuales ha tenido durante los últimos 6 meses?
66. En su vida, ¿con cuántos hombres ha tenido relaciones sexuales?
67. En su vida, ¿con cuántas mujeres ha tenido relaciones sexuales?
68. En su vida, ¿con cuántos transexuales ha tenido relaciones sexuales?
69. ¿Ha tenido relaciones sexuales sin condón los últimos 3 meses?

Velez-Gómez *et al.*

70. ¿Solicitó usted alguna vez una interrupción voluntaria del embarazo en alguna institución de salud? [Sólo mujeres]
71. ¿Sabe de un lugar donde se puedan conseguir condones?
72. Generalmente, ¿cómo obtienes los condones?
73. Cuando usted tiene relaciones sexuales, ¿quién sugiere el uso del condón generalmente?
74. ¿Qué tan fácil le resultaría conseguir un condón en caso de necesitarlo?
75. ¿Alguna vez una persona o institución le indicó la forma correcta de usar el condón?
76. ¿Cuánto tiempo estarías en una relación de pareja para decidir no utilizar condón con esta persona?
77. ¿Usted tiene o tuvo una pareja sexual estable los últimos 6 meses?
78. Su pareja estable es:
79. ¿Con qué frecuencia usted y/o su pareja estable usaron condón cuando tuvieron relaciones sexuales en los últimos 6 meses?
80. ¿Cuál o cuáles fueron los motivos por los cuales no utiliza condón con su pareja estable?
81. ¿Usted ha tenido parejas sexuales ocasionales o casuales durante los últimos 6 meses?
82. Sus parejas ocasionales generalmente son:
83. Con que frecuencia usted y/o sus parejas ocasionales usaron condón cuando tuvieron relaciones sexuales en los últimos 6 meses
84. ¿Cuál o cuáles fueron los motivos por los cuales no utiliza condón con su pareja ocasional?
85. Tipo de pareja
86. Sector/barrio donde vive la pareja
87. Lugar donde tuvieron el encuentro
88. ¿Cuál es la ubicación de este lugar?
89. Usted o su pareja consumieron antes o durante la relación
